# Supplementary material for: Circular RNA ANAPC7 Inhibits Tumor Growth and Muscle Wasting via PHLPP2–AKT–TGF-β Signaling Axis in Pancreatic Cancer
Source: PubMed Central journal article supplement — Gastroenterology. Author manuscript; Available in PMC 2023 Aug 16. (PMC10428768; doi:10.1053/j.gastro.2022.02.017), 2022-02-14
Supplement: NIHMS1873394-supplement-Suppl_2.pdf [file NIHMS1873394-supplement-Suppl_2.pdf]

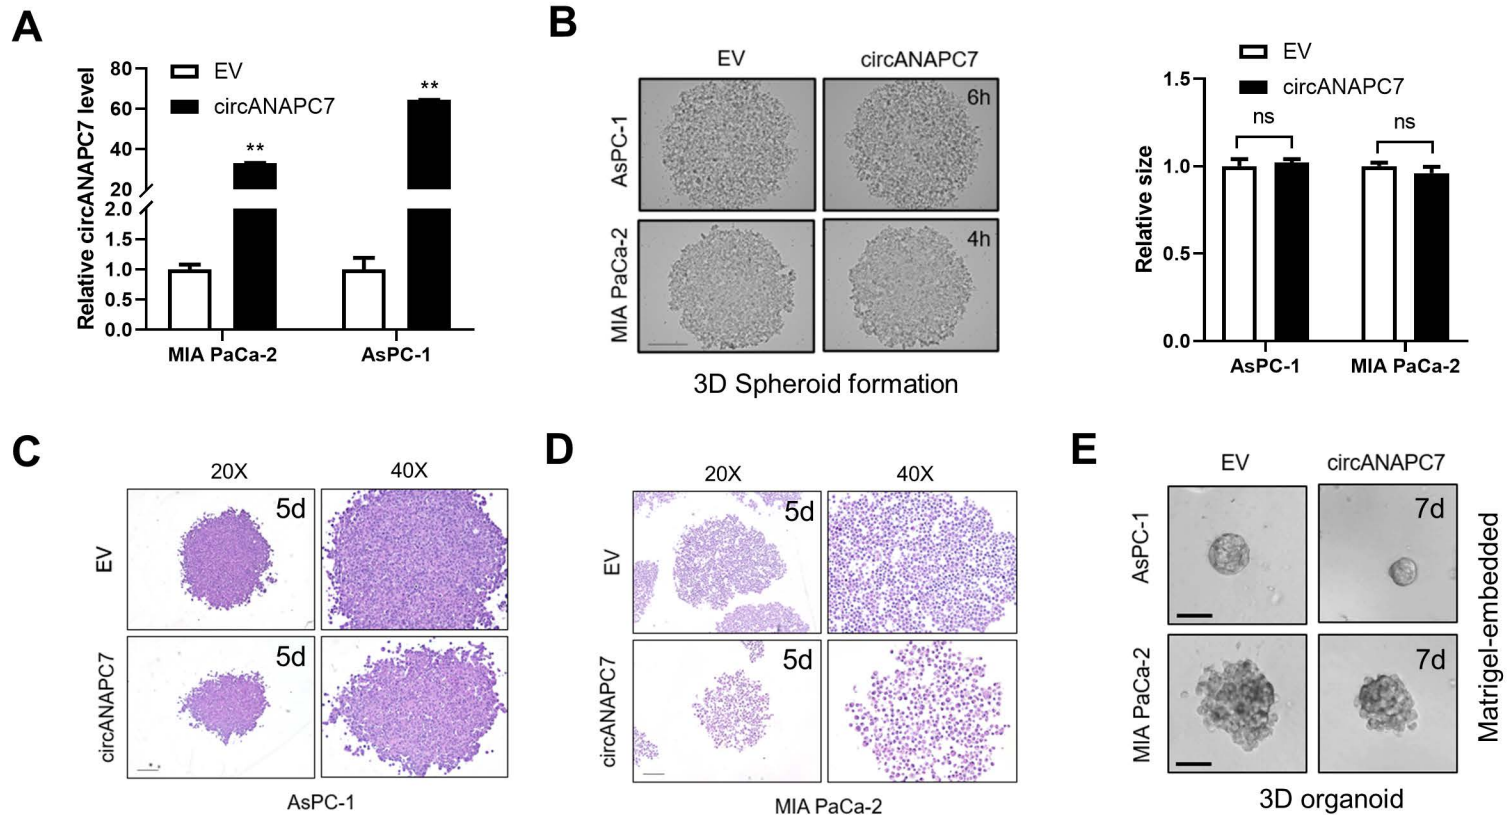

**Supplementary Figure 2. circANAPC7 inhibits pancreatic cancer cell proliferation.** (A) The expression level of circANAPC7 was assessed by RT-qPCR in AsPC-EV, AsPC-circANAPC7, MIA-EV, and MIA-circANAPC7 cells. (B) Representative images of Methylcellulose based 3D cancer cell spheroids established from AsPC-EV, AsPC-circANAPC7, MIA-EV, and MIA-circANAPC7 cells kept in the suspended droplets for indicated time (left panel). Scale bar, 200  $\mu$ m. Quantitative data of 3D cancer cell spheroids assay (right panel). (C) Representative H&E staining images of methylcellulose-based 3D cancer cell spheroids established from AsPC-EV, AsPC-circANAPC7 cells cultured for 5 days. Scale bar, 100  $\mu$ m. (D) Representative H&E staining images of methylcellulose-based 3D cancer cell spheroids established from MIA-EV, and MIA-circANAPC7 cells cultured for 5 days. Scale bar, 100  $\mu$ m. (E) Representative images of Matrigel-embedded 3D cancer cell organoids established from AsPC-EV, AsPC-circANAPC7, MIA-EV, and MIA-circANAPC7 cells cultured for 7 days. Scale bar, 50  $\mu$ m. ns: not significant,  $**P < .01$ .
