# Supplementary material for: Circular RNA ANAPC7 Inhibits Tumor Growth and Muscle Wasting via PHLPP2–AKT–TGF-β Signaling Axis in Pancreatic Cancer
Source: PubMed Central journal article supplement — Gastroenterology. Author manuscript; Available in PMC 2023 Aug 16. (PMC10428768; doi:10.1053/j.gastro.2022.02.017), 2022-02-14
Supplement: NIHMS1873394-supplement-Suppl_3.pdf [file NIHMS1873394-supplement-Suppl_3.pdf]

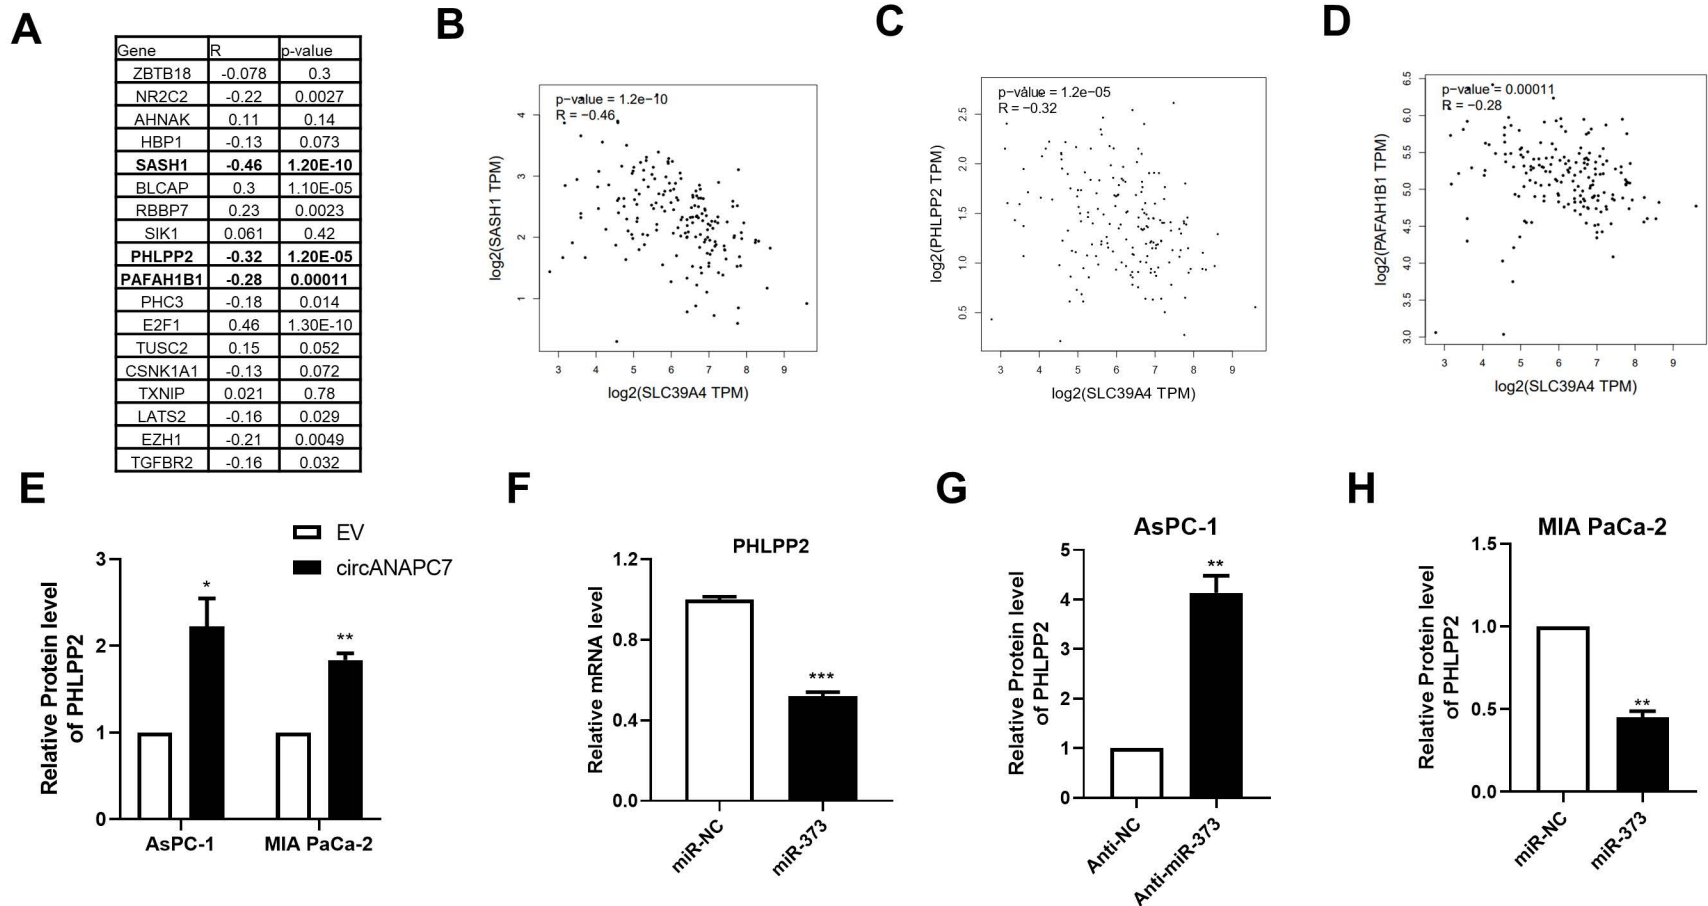

**Supplementary Figure 3. PHLPP2 is a downstream target of miR-373.** (A) Correlation between ZIP4 and 18 candidate targets of miR-373 in TCGA PAAD dataset was analyzed in GEPIA platform. (B-D) The correlation between SASH1 and ZIP4 (B), PHLPP2 and ZIP4 (C), PAFAH1B1 and ZIP4 (D) in TCGA PAAD dataset was analyzed in GEPIA platform. (E) Relative protein levels of PHLPP2 in Fig. 3D. (F) RT-qPCR analyzed mRNA levels of PHLPP2 in MIA PaCa-2 cells transfected with miR-NC or miR-373 mimics. (G) Relative protein levels of PHLPP2 in Fig. 3E (left panel). (H) Relative protein levels of PHLPP2 in Fig. 3E (right panel). \* $P < .05$ , \*\* $P < .01$ , \*\*\* $P < .001$ .
