# Supplementary material for: Circular RNA ANAPC7 Inhibits Tumor Growth and Muscle Wasting via PHLPP2–AKT–TGF-β Signaling Axis in Pancreatic Cancer
Source: PubMed Central journal article supplement — Gastroenterology. Author manuscript; Available in PMC 2023 Aug 16. (PMC10428768; doi:10.1053/j.gastro.2022.02.017), 2022-02-14
Supplement: NIHMS1873394-supplement-Suppl_4.pdf [file NIHMS1873394-supplement-Suppl_4.pdf]

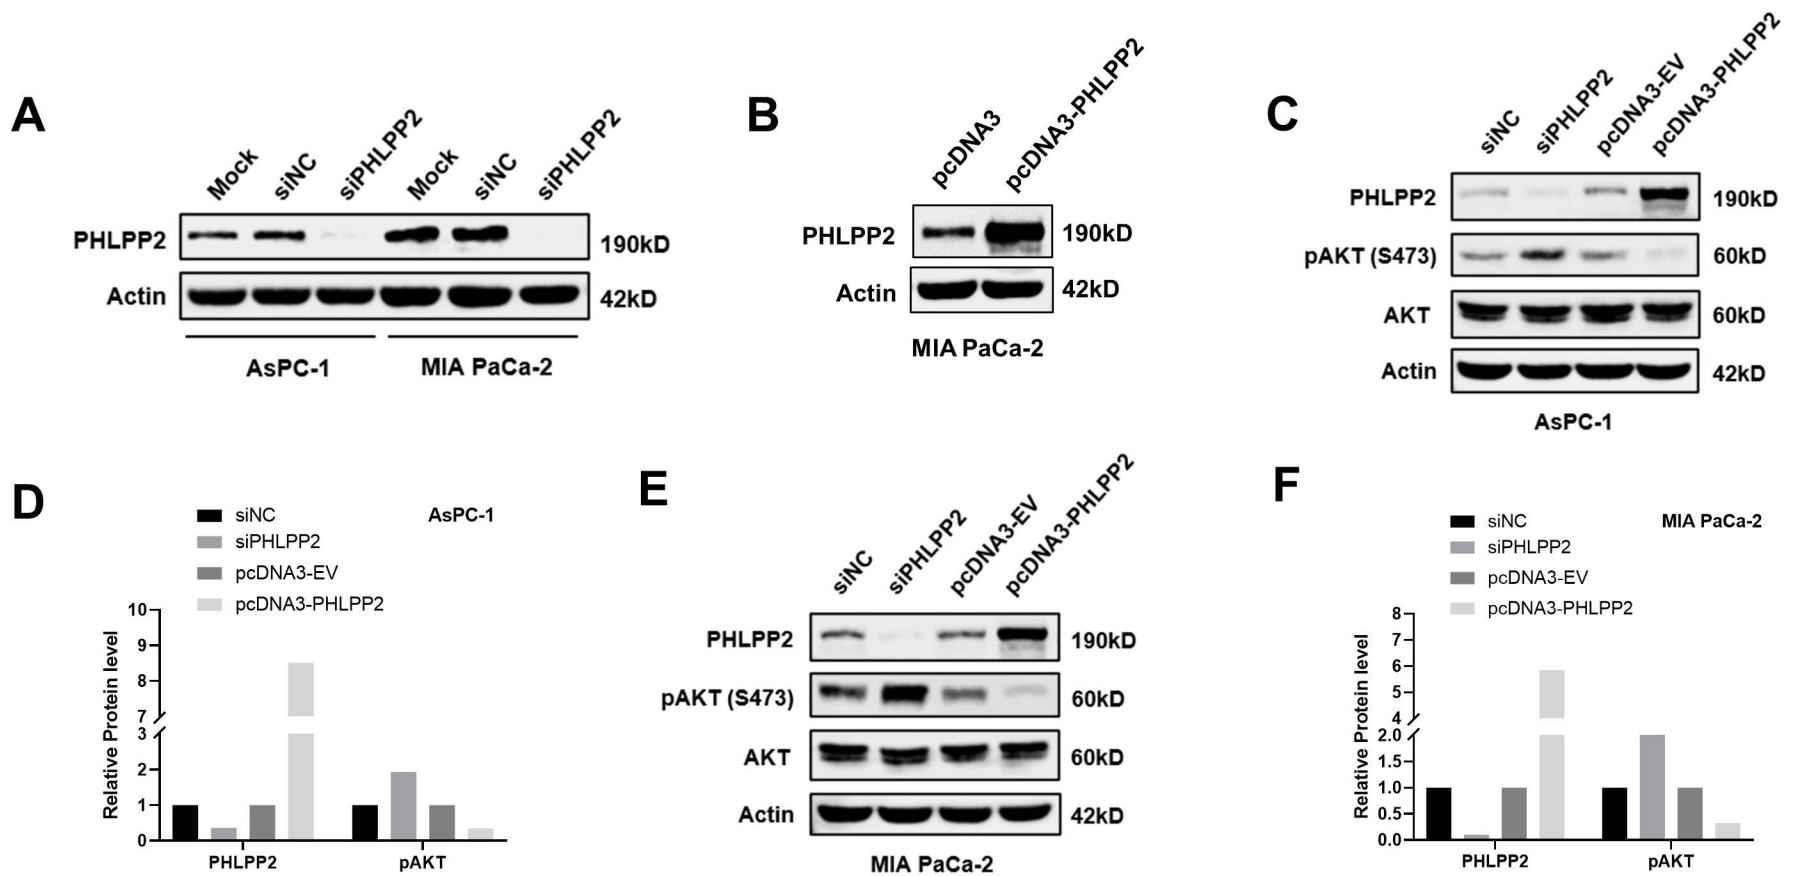

**Supplementary Figure 4. PHLPP2 could regulate AKT pathway in pancreatic cancer cells.** (A) The protein level of PHLPP2 was assessed by western blot in AsPC-1 and MIA PaCa-2 cells transfected with siRNAs against PHLPP2 for 72 hours. (B) The protein level of PHLPP2 was assessed by western blot in MIA PaCa-2 cells transfected with PHLPP2 expression plasmid for 72 hours. (C) The protein levels of PHLPP2, p-AKT, and AKT were assessed by western blot in AsPC-1 cells transfected with siNC, siPHLPP2, empty vector, or PHLPP2 expression vector. (D) Relative protein level of Fig. S4C. (E) The protein levels of PHLPP2, p-AKT, and AKT were assessed by western blot in MIA PaCa-2 cells transfected with siNC, siPHLPP2, empty vector, or PHLPP2 expression vector. (F) Relative protein level of Fig. S4E.
