# Supplementary material for: Circular RNA ANAPC7 Inhibits Tumor Growth and Muscle Wasting via PHLPP2–AKT–TGF-β Signaling Axis in Pancreatic Cancer
Source: PubMed Central journal article supplement — Gastroenterology. Author manuscript; Available in PMC 2023 Aug 16. (PMC10428768; doi:10.1053/j.gastro.2022.02.017), 2022-02-14
Supplement: NIHMS1873394-supplement-Suppl_6.pdf [file NIHMS1873394-supplement-Suppl_6.pdf]

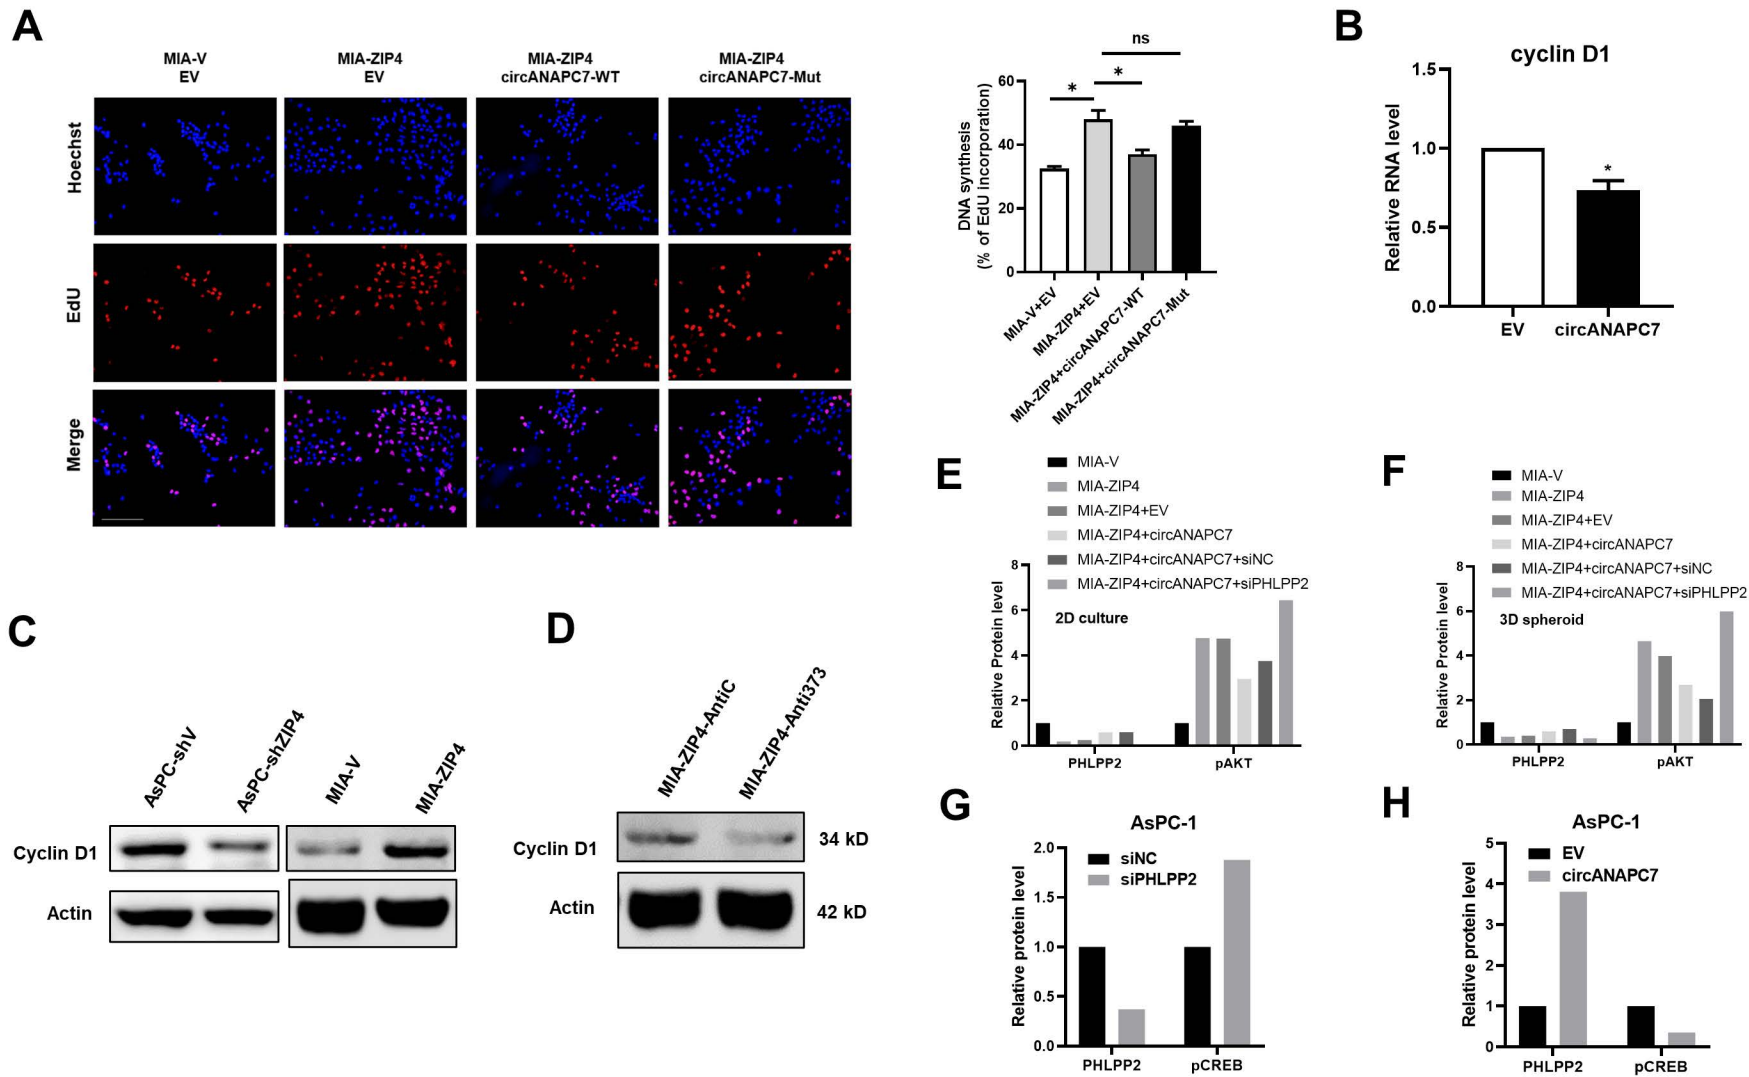

**Supplementary Figure 6. CircANAPC7 inhibits pancreatic cancer cell proliferation through ZIP4 mediated CREB/miR-373/PHLPP2 feedback loop.** (A) EdU assay of indicated cells. (B) RNA level of cyclin D1 in AsPC-shZIP4-Pre373-EV and AsPC-shZIP4-Pre373-circANAPC7 cells. (C) Protein level of cyclin D1 in AsPC-shV, AsPC-shZIP4, MIA-V, and MIA-ZIP4 cells. (D) Protein level of cyclin D1 in MIA-ZIP4-AntiC, and MIA-ZIP4-Anti373 cells. (E) Relative protein levels of Fig. 5I (left panel). (F) Relative protein levels of Fig. 5I (right panel). (G) Relative protein levels of Fig. 5J. (H) Relative protein levels of Fig. 5K. ns: not significant, \* $P < .05$ .
